# Supplementary material for: Enhanced photoelectrochemical water-splitting performance of SrNbO2N photoanodes using flux-assisted synthesis method and surface defect management
Source: Royal Society of Chemistry journal article supplement (doi:10.1039/c9se01056d), 2020-01-01
Supplement: c9se01056d1.pdf [file c9se01056d1.pdf]

### Supplementary Information

#### **Enhanced photoelectrochemical water-splitting performance of SrNbO<sub>2</sub>N photoanodes by flux-assisted synthesis method and surface defect management**

Yingchen Yang <sup>a</sup>, Zirui Lou <sup>a</sup>, Weisheng Lei <sup>a</sup>, Yichen Wang <sup>a</sup>, Rong Liang <sup>a</sup>, Chao Qin <sup>a</sup>, and Liping Zhu <sup>a, \*</sup>

<sup>a</sup>State Key Laboratory of Silicon Materials, School of Materials Science and Engineering, Zhejiang University, Hangzhou.

**TableS1.** Detailed parameter for the synthesis of SrNbO<sub>2</sub>N particles

| Number        | SrCO <sub>3</sub> /g | Nb <sub>2</sub> O <sub>5</sub> /g | Ratio(SrCl <sub>2</sub> :KCl) | Temperature/°C | post-Ar |
|---------------|----------------------|-----------------------------------|-------------------------------|----------------|---------|
| 1(SNON800)    | 0.4097               | 0.455                             | 1:1                           | 800            | Yes     |
| 2(SNON850)    | 0.4097               | 0.455                             | 1:1                           | 850            | Yes     |
| 3(SNON900)    | 0.4097               | 0.455                             | 1:1                           | 900            | Yes     |
| 4(SNON850-2)  | 0.4097               | 0.455                             | 2:1                           | 850            | Yes     |
| 5(SNON850-2') | 0.4097               | 0.455                             | 2:1                           | 850            | No      |
| 6(SNON850-3)  | 0.4097               | 0.455                             | 3:1                           | 850            | Yes     |

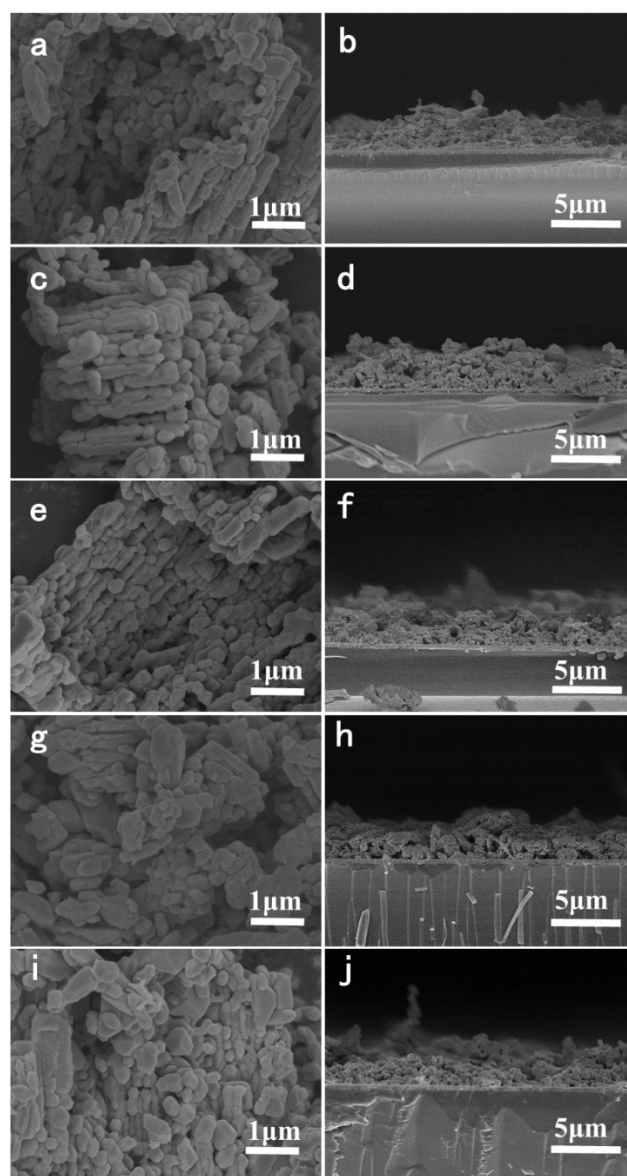

Fig. S1 (a)(c)(e)(g)(i) SEM images of SNON800, SNON850, SNON900, SNON850-2 and SNON850-3 particles, respectively  
(b)(d)(f)(h)(j) SEM images of cross sections for SNON800, SNON850, SNON900, SNON850-2 and SNON850-3 photoanodes, respectively

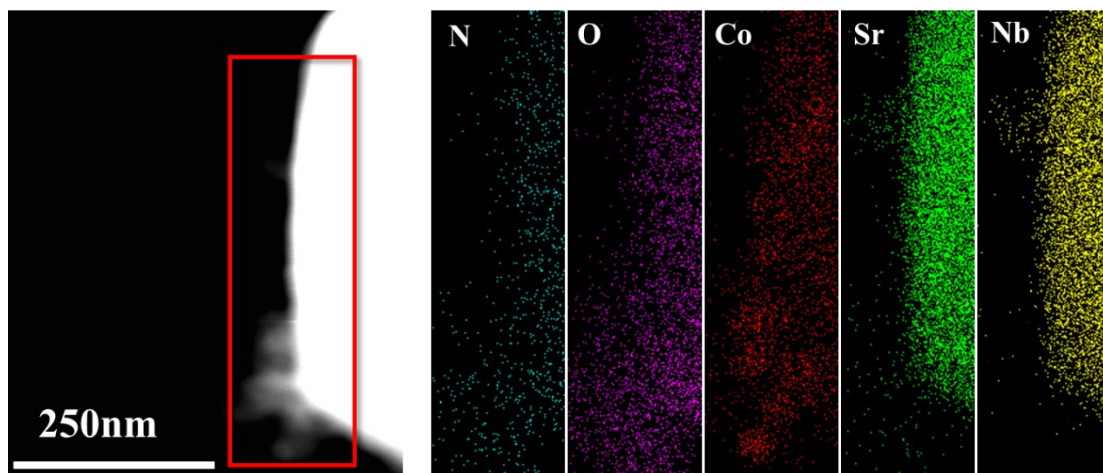

Fig. S2 TEM image and EDX elemental mapping images of N, O, Co, Sr and Nb for SrNbO<sub>2</sub>N particles.

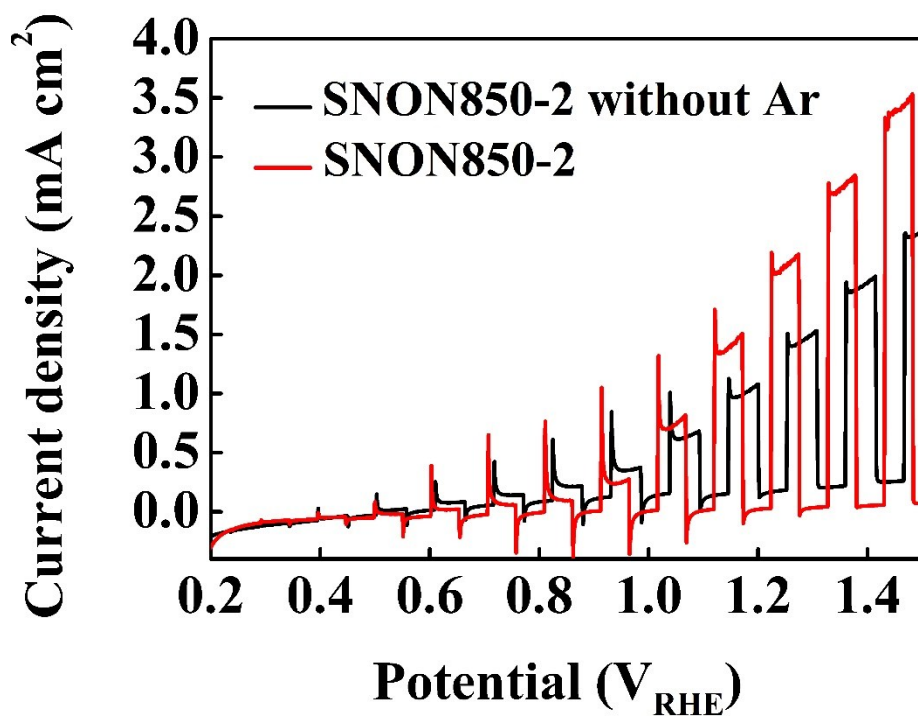

Fig. S3. Current-potential curves of SNON850-2 and SNON850-2 without Ar annealing

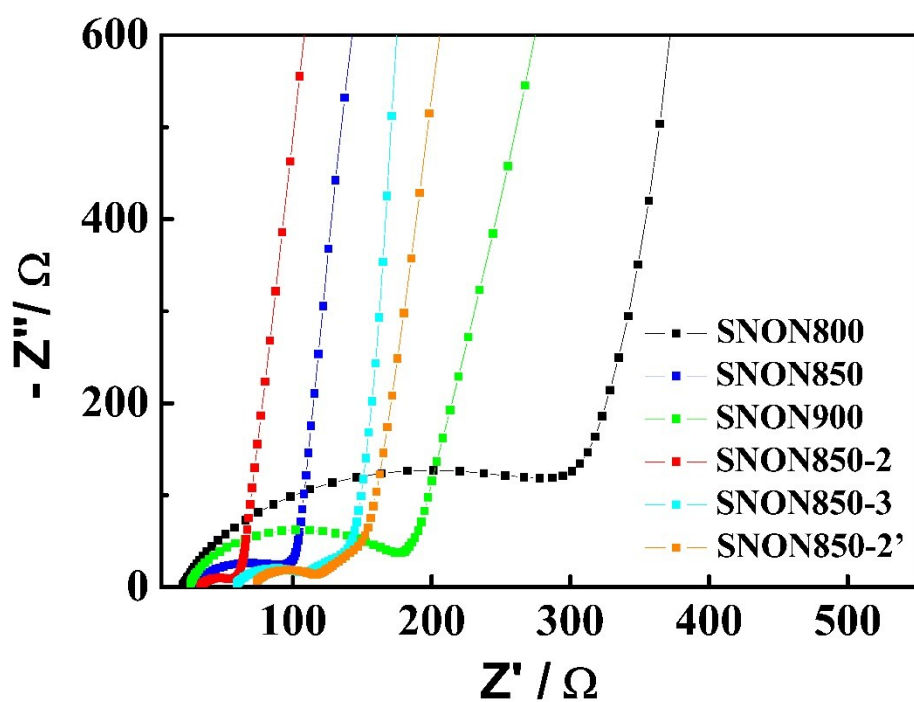

Fig. S4. The electrochemical impedance spectroscopy (EIS) of SrNbO<sub>2</sub>N series.

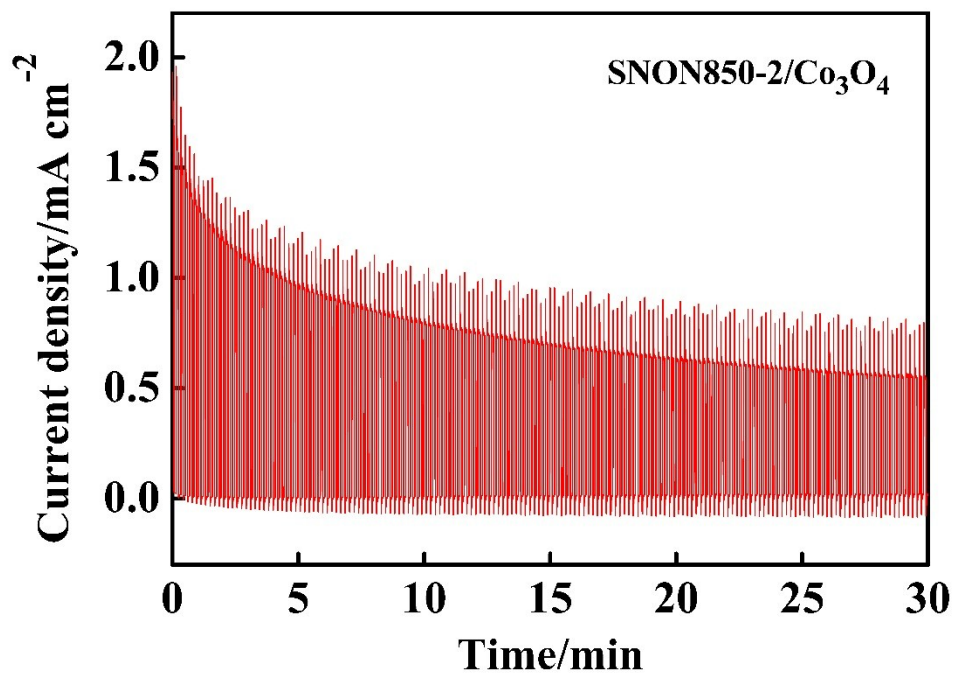

Fig. S5 Current-time curve for SNON850-2/C<sub>0</sub>3O<sub>4</sub> photoanode performed at 1.23V versus RHE under simulated sunlight

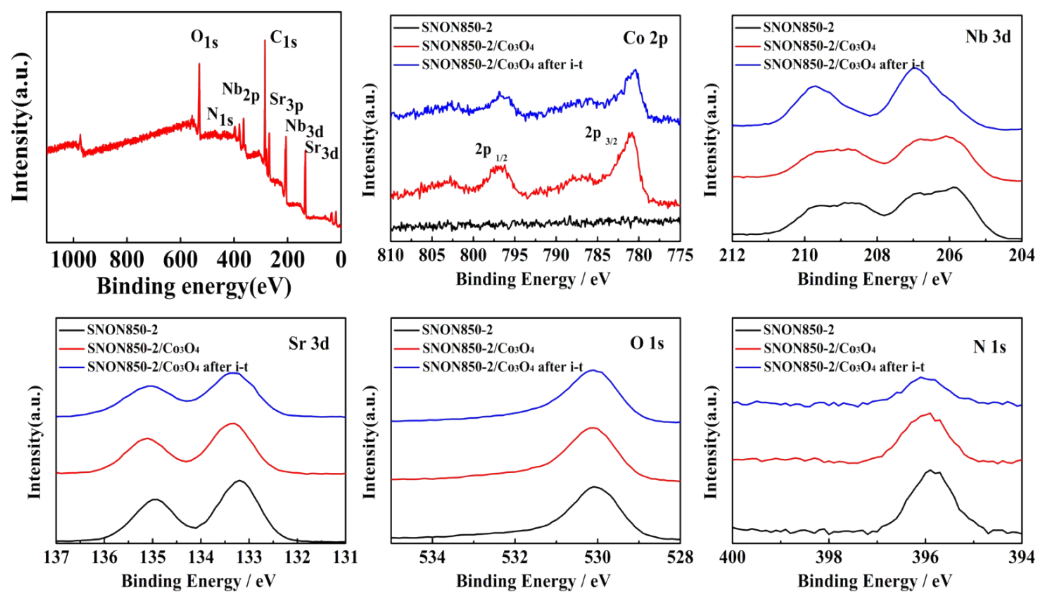

Fig. S6 XPS spectrum for SNON850-2, SNON-2/Co<sub>3</sub>O<sub>4</sub> and SNON850-2/Co<sub>3</sub>O<sub>4</sub> after photoelectrochemical measurement
